# Supplementary material for: Impact of Runoff Schemes on Global Flow Discharge: A Comprehensive Analysis Using the Noah-MP and CaMa-Flood Models
Source: Copernicus journal article supplement (doi:10.5194/hess-2024-264), 2024-09-03
Supplement: Supplementary file 1 [file hess-2024-264-supplement.pdf]

**Table S1: Geophysical and vegetative characteristics (CaMa-Flood slope and Noah-MP soil and land cover types) of the selected global river basins**

| Basin           | Drainage area (km <sup>2</sup> ) | Mean Slope (%) | Dominant Soil Texture | Dominant Land Cover          |
|-----------------|----------------------------------|----------------|-----------------------|------------------------------|
| Yukon           | 824794.7                         | 1.0            | Loam                  | Evergreen Needleleaf Forest  |
| Mackenzie       | 1698403.9                        | 0.7            | Sandy Loam            | Evergreen Needleleaf Forest  |
| Fraser          | 216563.0                         | 2.0            | Loam                  | Evergreen Needleleaf Forest  |
| Columbia        | 652359.5                         | 1.9            | Silt Loam             | Evergreen Needleleaf Forest  |
| Mississippi     | 2918820.0                        | 0.4            | Silt Loam             | Grasslands                   |
| Pearl           | 16920.2                          | 0.1            | Sandy Loam            | Woody Savannas               |
| Orinoco         | 821894.3                         | 0.7            | Clay Loam             | Evergreen Broadleaf Forest   |
| Amazon          | 4671461.8                        | 0.7            | Loam                  | Evergreen Broadleaf Forest   |
| Tocantins       | 759793.1                         | 0.4            | Clay                  | Savannas                     |
| Parnaiba        | 298405.3                         | 0.5            | Sandy Clay Loam       | Savannas                     |
| Parana          | 2520777.8                        | 0.5            | Loam                  | Savannas                     |
| Uruguay         | 242692.5                         | 0.5            | Clay                  | Grasslands                   |
| Ebro            | 84016.4                          | 1.3            | Loam                  | Croplands                    |
| Rhone           | 92923.2                          | 1.8            | Loam                  | Croplands                    |
| Rhine           | 159337.8                         | 0.9            | Loam                  | Mixed Forests                |
| Po              | 72020.4                          | 1.9            | Clay Loam             | Croplands                    |
| Elbe            | 131118.4                         | 0.5            | Loam                  | Croplands                    |
| Danube          | 777784.1                         | 0.8            | Loam                  | Croplands                    |
| Onega           | 63044.8                          | 0.2            | Silt Loam             | Mixed Forests                |
| Severnaya Dvina | 343794.8                         | 0.2            | Silt Loam             | Mixed Forests                |
| Volga           | 1366093.1                        | 0.2            | Loam                  | Mixed Forests                |
| Don             | 380598.0                         | 0.2            | Loam                  | Croplands                    |
| Chelif          | 44326.5                          | 0.9            | Loam                  | Open Shrublands              |
| Niger           | 2061636.3                        | 0.3            | Loam                  | Barren or Sparsely Vegetated |
| Lake Chad       | 601365.3                         | 0.3            | Loam                  | Savannas                     |
| Congo           | 3619085.4                        | 0.4            | Sandy Loam            | Woody Savannas               |
| Okavango        | 229666.2                         | 0.3            | Sandy Loam            | Savannas                     |
| Limpopo         | 258770.3                         | 0.5            | Sandy Loam            | Savannas                     |
| Orange          | 784762.9                         | 0.5            | Sandy Loam            | Open Shrublands              |
| Ob              | 2454226.9                        | 0.4            | Loam                  | Mixed Forests                |

|                |           |     |                 |                             |
|----------------|-----------|-----|-----------------|-----------------------------|
| Yenisey        | 2431664.8 | 0.8 | Silt Loam       | Mixed Forests               |
| Lena           | 2458634.9 | 0.7 | Silt Loam       | Deciduous Needleleaf Forest |
| Indigirka      | 304905.7  | 1.0 | Loam            | Wooded Tundra               |
| Kolyma         | 422146.8  | 0.7 | Silt Loam       | Open Shrublands             |
| Anadyr         | 106004.5  | 0.6 | Loam            | Wooded Tundra               |
| Amur           | 1877929.1 | 0.5 | Loam            | Mixed Forests               |
| Amu Darya      | 282058.5  | 3.6 | Loam            | Grasslands                  |
| Yellow         | 293382.1  | 1.5 | Loam            | Grasslands                  |
| Ganges         | 941568.4  | 1.3 | Loam            | Croplands                   |
| Irrawaddy      | 361561.6  | 1.6 | Clay Loam       | Evergreen Broadleaf Forest  |
| Mekong         | 637746.5  | 1.3 | Clay Loam       | Evergreen Broadleaf Forest  |
| Yangtze        | 1677763.7 | 1.8 | Clay Loam       | Mixed Forests               |
| Murray-Darling | 754963.3  | 0.4 | Sandy Clay Loam | Open Shrublands             |

**Table S2: Correlation Coefficient of Each Experiment Across Different Basins**

| Basin       | EXP1 | EXP2 | EXP3 | EXP4 | EXP6 | EXP7 | EXP8 | ERA5-Land |
|-------------|------|------|------|------|------|------|------|-----------|
| Yukon       | 0.90 | 0.91 | 0.88 | 0.88 | 0.88 | 0.84 | 0.89 | 0.69      |
| Mackenzie   | 0.81 | 0.67 | 0.70 | 0.87 | 0.87 | 0.88 | 0.74 | 0.62      |
| Fraser      | 0.91 | 0.94 | 0.92 | 0.93 | 0.93 | 0.92 | 0.81 | 0.94      |
| Columbia    | 0.57 | 0.55 | 0.55 | 0.61 | 0.59 | 0.56 | 0.64 | 0.62      |
| Mississippi | 0.81 | 0.67 | 0.70 | 0.87 | 0.87 | 0.88 | 0.74 | 0.62      |
| Pearl       | 0.71 | 0.64 | 0.65 | 0.70 | 0.69 | 0.65 | 0.57 | 0.69      |
| Orinoco     | 0.79 | 0.87 | 0.85 | 0.83 | 0.84 | 0.85 | 0.68 | 0.83      |
| Amazon      | 0.87 | 0.94 | 0.93 | 0.92 | 0.91 | 0.93 | 0.83 | 0.95      |
| Tocantins   | 0.84 | 0.90 | 0.88 | 0.86 | 0.86 | 0.88 | 0.63 | 0.91      |
| Parnaiba    | 0.83 | 0.88 | 0.83 | 0.88 | 0.88 | 0.82 | 0.70 | 0.86      |
| Parana      | 0.67 | 0.72 | 0.73 | 0.70 | 0.67 | 0.72 | 0.54 | 0.72      |
| Uruguay     | 0.77 | 0.79 | 0.81 | 0.81 | 0.81 | 0.80 | 0.72 | 0.82      |
| Ebro        | 0.41 | 0.57 | 0.53 | 0.62 | 0.53 | 0.54 | 0.32 | 0.59      |
| Rhone       | 0.48 | 0.44 | 0.46 | 0.50 | 0.46 | 0.47 | 0.42 | 0.60      |
| Rhine       | 0.50 | 0.51 | 0.49 | 0.63 | 0.56 | 0.53 | 0.56 | 0.69      |
| Po          | 0.71 | 0.67 | 0.65 | 0.71 | 0.69 | 0.67 | 0.63 | 0.70      |

|                 |      |      |      |      |      |      |      |      |
|-----------------|------|------|------|------|------|------|------|------|
| Elbe            | 0.69 | 0.75 | 0.68 | 0.76 | 0.69 | 0.73 | 0.36 | 0.73 |
| Danube          | 0.29 | 0.23 | 0.29 | 0.34 | 0.27 | 0.32 | 0.28 | 0.34 |
| Onega           | 0.81 | 0.70 | 0.64 | 0.78 | 0.79 | 0.68 | 0.86 | 0.53 |
| Severnaya Dvina | 0.86 | 0.69 | 0.69 | 0.78 | 0.79 | 0.71 | 0.88 | 0.56 |
| Volga           | 0.45 | 0.42 | 0.41 | 0.43 | 0.45 | 0.45 | 0.34 | 0.29 |
| Don             | 0.49 | 0.40 | 0.39 | 0.37 | 0.38 | 0.41 | 0.30 | 0.33 |
| Chelif          | 0.59 | 0.61 | 0.49 | 0.63 | 0.66 | 0.20 | 0.58 | 0.63 |
| Niger           | 0.83 | 0.81 | 0.74 | 0.83 | 0.84 | 0.72 | 0.87 | 0.81 |
| Lake Chad       | 0.81 | 0.85 | 0.83 | 0.80 | 0.81 | 0.83 | 0.54 | 0.84 |
| Congo           | 0.49 | 0.46 | 0.48 | 0.48 | 0.44 | 0.50 | 0.56 | 0.50 |
| Okavango        | 0.68 | 0.79 | 0.82 | 0.78 | 0.81 | 0.82 | 0.32 | 0.84 |
| Limpopo         | 0.44 | 0.45 | 0.40 | 0.51 | 0.55 | 0.23 | 0.56 | 0.56 |
| Orange          | 0.53 | 0.62 | 0.58 | 0.61 | 0.56 | 0.56 | 0.38 | 0.61 |
| Ob              | 0.73 | 0.50 | 0.70 | 0.48 | 0.53 | 0.62 | 0.35 | 0.30 |
| Yenisey         | 0.83 | 0.85 | 0.83 | 0.72 | 0.74 | 0.72 | 0.73 | 0.61 |
| Lena            | 0.81 | 0.86 | 0.87 | 0.79 | 0.81 | 0.75 | 0.82 | 0.70 |
| Indigirka       | 0.62 | 0.47 | 0.76 | 0.80 | 0.79 | 0.60 | 0.76 | 0.64 |
| Kolyma          | 0.74 | 0.70 | 0.79 | 0.76 | 0.79 | 0.72 | 0.76 | 0.74 |
| Anadyr          | 0.51 | 0.39 | 0.53 | 0.70 | 0.68 | 0.66 | 0.55 | 0.84 |
| Amur            | 0.90 | 0.94 | 0.76 | 0.96 | 0.96 | 0.87 | 0.92 | 0.77 |
| Amu Darya       | 0.64 | 0.65 | 0.63 | 0.69 | 0.68 | 0.67 | 0.52 | 0.72 |
| Yellow          | 0.76 | 0.75 | 0.76 | 0.82 | 0.83 | 0.60 | 0.77 | 0.73 |
| Ganges          | 0.89 | 0.88 | 0.87 | 0.89 | 0.89 | 0.86 | 0.89 | 0.89 |
| Irrawaddy       | 0.95 | 0.97 | 0.97 | 0.96 | 0.96 | 0.97 | 0.86 | 0.96 |
| Mekong          | 0.97 | 0.95 | 0.94 | 0.96 | 0.94 | 0.94 | 0.84 | 0.97 |
| Yangtze         | 0.95 | 0.94 | 0.95 | 0.96 | 0.95 | 0.93 | 0.87 | 0.96 |
| Murray-Darling  | 0.77 | 0.71 | 0.68 | 0.66 | 0.63 | 0.68 | 0.39 | 0.76 |

5

**Table S3: Mean Absolute Error of Each Experiment Across Different Basins**

| Basin     | EXP1   | EXP2   | EXP3   | EXP4   | EXP6   | EXP7   | EXP8   | ERA5-Land |
|-----------|--------|--------|--------|--------|--------|--------|--------|-----------|
| Yukon     | 2824.1 | 2818.5 | 1872.1 | 2066.7 | 2151.8 | 2744.2 | 2625.5 | 3129.2    |
| Mackenzie | 4161.5 | 3990.4 | 3153.2 | 2707.0 | 2582.2 | 3019.2 | 8790.9 | 3374.7    |

|                 |         |         |         |         |         |         |         |         |
|-----------------|---------|---------|---------|---------|---------|---------|---------|---------|
| Fraser          | 1206.1  | 777.0   | 1077.6  | 1087.9  | 971.2   | 1042.0  | 2162.8  | 1076.1  |
| Columbia        | 4187.6  | 3491.5  | 4203.2  | 4072.5  | 3720.2  | 4171.5  | 5828.1  | 3738.0  |
| Mississippi     | 12434.8 | 9131.1  | 7933.4  | 5972.0  | 6505.8  | 8560.8  | 29357.2 | 5172.6  |
| Pearl           | 154.3   | 163.1   | 158.5   | 148.7   | 152.4   | 159.5   | 259.8   | 158.6   |
| Orinoco         | 11108.0 | 7928.9  | 8821.1  | 9073.9  | 8979.3  | 8869.9  | 13659.5 | 9352.6  |
| Amazon          | 40517.6 | 36792.1 | 36749.4 | 28587.2 | 32665.9 | 37239.4 | 40319.2 | 29266.8 |
| Tocantins       | 8103.7  | 6425.9  | 7366.7  | 8475.7  | 7667.3  | 7725.1  | 18290.9 | 7404.4  |
| Parnaiba        | 493.7   | 465.9   | 467.8   | 428.6   | 436.1   | 472.6   | 783.7   | 510.9   |
| Parana          | 5617.5  | 4787.6  | 5342.0  | 9496.3  | 7762.9  | 5336.2  | 29694.7 | 5648.0  |
| Uruguay         | 2775.8  | 2118.2  | 2001.1  | 1987.5  | 1914.8  | 2114.8  | 4480.1  | 1833.5  |
| Ebro            | 179.9   | 135.8   | 145.7   | 208.8   | 185.4   | 147.4   | 960.6   | 154.8   |
| Rhone           | 807.5   | 720.7   | 735.5   | 715.9   | 738.8   | 729.1   | 1249.6  | 660.3   |
| Rhine           | 802.7   | 696.5   | 688.6   | 647.8   | 663.1   | 670.7   | 1687.1  | 695.2   |
| Po              | 618.4   | 564.2   | 555.7   | 535.7   | 547.6   | 541.1   | 882.5   | 557.3   |
| Elbe            | 404.0   | 250.8   | 262.1   | 224.0   | 222.1   | 265.4   | 1284.5  | 271.8   |
| Danube          | 2755.0  | 2554.5  | 2536.7  | 2566.7  | 2522.6  | 2480.4  | 7620.4  | 2508.2  |
| Onega           | 224.7   | 273.2   | 268.5   | 241.6   | 237.8   | 258.3   | 396.2   | 375.5   |
| Severnaya Dvina | 1196.6  | 1590.4  | 1584.5  | 1422.6  | 1392.5  | 1580.3  | 2318.2  | 2265.5  |
| Volga           | 4191.5  | 3676.9  | 4096.1  | 4491.8  | 4071.1  | 3933.9  | 12341.9 | 4712.1  |
| Don             | 385.4   | 322.3   | 417.0   | 1038.6  | 673.7   | 406.7   | 3467.2  | 405.1   |
| Chelif          | 8.6     | 26.0    | 16.9    | 65.2    | 54.5    | 15.7    | 364.4   | 8.3     |
| Niger           | 2418.8  | 2690.6  | 2757.3  | 2590.3  | 2507.3  | 2800.2  | 6657.5  | 2552.1  |
| Lake Chad       | 270.0   | 300.5   | 268.4   | 295.4   | 284.5   | 261.0   | 458.4   | 265.7   |
| Congo           | 13990.0 | 14716.1 | 15854.8 | 19240.4 | 16843.2 | 15612.4 | 67335.5 | 19516.3 |
| Okavango        | 181.8   | 135.7   | 156.1   | 159.6   | 146.3   | 157.6   | 613.8   | 223.6   |
| Limpopo         | 141.8   | 271.9   | 227.0   | 431.7   | 388.6   | 203.9   | 1727.0  | 71.0    |
| Orange          | 505.1   | 1105.4  | 952.8   | 2095.1  | 1698.4  | 803.5   | 8119.5  | 304.3   |
| Ob              | 5623.7  | 6777.0  | 5825.9  | 8640.8  | 7446.2  | 6189.2  | 17824.1 | 9379.3  |
| Yenisey         | 8521.4  | 8666.3  | 7468.7  | 7377.4  | 7463.8  | 7692.7  | 14922.4 | 8718.5  |
| Lena            | 7760.5  | 7897.6  | 5934.9  | 7514.8  | 6782.2  | 8990.6  | 10389.7 | 10181.4 |
| Indigirka       | 1539.4  | 1525.9  | 1283.1  | 1365.6  | 1342.7  | 1670.7  | 1278.5  | 1432.1  |
| Kolyma          | 2463.2  | 2568.0  | 1961.3  | 2047.8  | 1861.8  | 2419.5  | 2369.6  | 2402.7  |

|                |        |        |        |        |        |        |         |        |
|----------------|--------|--------|--------|--------|--------|--------|---------|--------|
| Anadyr         | 904.5  | 975.0  | 802.7  | 775.3  | 784.5  | 862.2  | 825.2   | 685.0  |
| Amur           | 3998.6 | 2912.7 | 3864.8 | 2525.8 | 2067.1 | 4107.0 | 14174.3 | 4429.4 |
| Amu Darya      | 1049.7 | 1025.3 | 961.6  | 916.4  | 960.0  | 975.6  | 988.5   | 921.5  |
| Yellow         | 327.3  | 318.1  | 314.9  | 248.8  | 194.5  | 282.0  | 1956.7  | 375.4  |
| Ganges         | 3753.2 | 4817.2 | 5191.9 | 6304.0 | 5241.0 | 5042.6 | 11933.1 | 5050.7 |
| Irrawaddy      | 3530.6 | 2449.5 | 2933.8 | 3408.3 | 3179.7 | 2907.7 | 6727.8  | 5001.3 |
| Mekong         | 3765.6 | 3504.4 | 3227.1 | 2641.9 | 3296.5 | 3514.3 | 8390.6  | 2658.7 |
| Yangtze        | 2455.0 | 3156.9 | 4330.4 | 4874.2 | 3867.9 | 3698.6 | 14401.5 | 7394.9 |
| Murray-Darling | 346.7  | 778.1  | 687.6  | 1376.7 | 1183.1 | 616.0  | 3832.2  | 316.3  |

**Table S4: Root Mean Squared Error of Each Experiment Across Different Basins**

| Basin           | EXP1    | EXP2    | EXP3    | EXP4    | EXP6    | EXP7    | EXP8    | ERA5-Land |
|-----------------|---------|---------|---------|---------|---------|---------|---------|-----------|
| Yukon           | 4218.0  | 4178.4  | 2891.4  | 3214.7  | 3493.1  | 4054.7  | 3423.1  | 4292.4    |
| Mackenzie       | 5604.8  | 5886.8  | 4702.7  | 3763.6  | 3961.5  | 4590.2  | 9845.7  | 5081.1    |
| Fraser          | 1851.7  | 1233.6  | 1865.7  | 1982.5  | 1712.9  | 1813.3  | 3175.8  | 2012.6    |
| Columbia        | 5401.1  | 4636.0  | 5880.9  | 6261.6  | 5398.8  | 5815.6  | 8188.3  | 5796.1    |
| Mississippi     | 14855.4 | 11644.0 | 10397.8 | 7408.8  | 8140.6  | 10854.1 | 32301.2 | 6789.8    |
| Pearl           | 289.5   | 308.8   | 294.4   | 272.5   | 286.2   | 293.6   | 346.5   | 286.5     |
| Orinoco         | 13864.2 | 10622.5 | 11621.7 | 11713.8 | 11550.2 | 11688.8 | 18449.0 | 12958.3   |
| Amazon          | 51867.0 | 42683.3 | 45321.6 | 37618.6 | 40467.5 | 46105.6 | 44036.7 | 35919.0   |
| Tocantins       | 11582.2 | 9476.9  | 11150.4 | 12046.7 | 10577.7 | 11546.1 | 24036.2 | 11412.1   |
| Parnaiba        | 588.5   | 531.0   | 569.3   | 512.8   | 504.4   | 573.4   | 1238.7  | 584.9     |
| Parana          | 6579.2  | 5875.5  | 6670.7  | 10814.0 | 9099.2  | 6582.1  | 31622.9 | 6942.4    |
| Uruguay         | 3811.3  | 3322.3  | 3059.8  | 2716.5  | 2767.1  | 3231.9  | 5360.0  | 2572.7    |
| Ebro            | 291.2   | 228.7   | 243.3   | 286.1   | 272.5   | 243.5   | 1330.4  | 238.6     |
| Rhone           | 1079.2  | 1024.1  | 1046.0  | 1021.6  | 1036.3  | 1030.3  | 1735.0  | 935.2     |
| Rhine           | 1139.5  | 1047.0  | 1073.7  | 924.2   | 973.6   | 1032.4  | 2098.4  | 940.3     |
| Po              | 810.8   | 792.1   | 826.8   | 753.5   | 767.5   | 797.7   | 1116.5  | 776.2     |
| Elbe            | 536.1   | 389.5   | 395.9   | 296.6   | 317.4   | 388.6   | 1482.9  | 371.0     |
| Danube          | 3389.0  | 3126.4  | 3134.9  | 3245.5  | 3111.9  | 3074.6  | 8728.1  | 3135.8    |
| Onega           | 450.9   | 558.1   | 558.9   | 458.5   | 477.9   | 538.0   | 526.0   | 603.1     |
| Severnaya Dvina | 2559.2  | 3466.3  | 3318.1  | 2867.1  | 2973.8  | 3290.8  | 2901.3  | 3679.6    |

|                |         |         |         |         |         |         |         |         |
|----------------|---------|---------|---------|---------|---------|---------|---------|---------|
| Volga          | 5610.0  | 5096.4  | 5605.3  | 6352.5  | 5399.8  | 5366.2  | 14665.1 | 7016.9  |
| Don            | 461.5   | 449.4   | 581.5   | 1305.4  | 868.2   | 564.8   | 3808.8  | 564.3   |
| Chelif         | 26.5    | 30.4    | 25.6    | 76.8    | 79.2    | 27.3    | 571.7   | 22.0    |
| Niger          | 3623.4  | 3611.0  | 3606.4  | 3125.3  | 3182.5  | 3686.3  | 8735.6  | 3953.9  |
| Lake Chad      | 434.9   | 435.7   | 420.9   | 442.2   | 437.2   | 417.7   | 625.4   | 443.2   |
| Congo          | 17360.1 | 18004.9 | 19599.2 | 24039.1 | 21214.8 | 19308.4 | 71054.2 | 24949.9 |
| Okavango       | 220.8   | 165.0   | 186.2   | 206.8   | 177.4   | 188.3   | 904.4   | 250.3   |
| Limpopo        | 252.8   | 329.3   | 299.1   | 508.1   | 493.4   | 294.7   | 2623.6  | 221.2   |
| Orange         | 703.0   | 1241.0  | 1132.1  | 2466.5  | 2077.3  | 988.2   | 11380.1 | 526.9   |
| Ob             | 8580.3  | 9719.9  | 7877.0  | 10449.5 | 9503.8  | 8724.5  | 21551.6 | 10983.4 |
| Yenisey        | 16931.2 | 15981.2 | 12737.2 | 16505.7 | 17027.3 | 18195.0 | 19439.4 | 18273.9 |
| Lena           | 15708.4 | 14044.2 | 10521.1 | 14274.8 | 14293.4 | 16450.9 | 14694.8 | 16147.4 |
| Indigirka      | 2625.9  | 2676.9  | 2129.5  | 1970.1  | 2109.6  | 2502.0  | 2083.2  | 2046.1  |
| Kolyma         | 4813.5  | 4697.0  | 3333.4  | 3912.8  | 3995.2  | 4538.1  | 3681.7  | 3789.4  |
| Anadyr         | 1716.6  | 1792.6  | 1621.3  | 1401.2  | 1493.5  | 1541.7  | 1570.1  | 1059.3  |
| Amur           | 5732.7  | 4235.4  | 5041.6  | 3003.9  | 2677.2  | 5156.8  | 18007.6 | 5198.0  |
| Amu Darya      | 1280.9  | 1253.6  | 1183.0  | 1127.0  | 1169.5  | 1184.7  | 1283.8  | 1110.3  |
| Yellow         | 459.5   | 434.6   | 489.7   | 375.2   | 304.6   | 438.9   | 2835.4  | 499.6   |
| Ganges         | 7067.1  | 7519.6  | 8449.8  | 9400.9  | 8200.2  | 8456.7  | 16541.4 | 7862.2  |
| Irrawaddy      | 4912.0  | 3754.5  | 4502.1  | 5049.0  | 4544.7  | 4455.9  | 9849.0  | 7780.2  |
| Mekong         | 5424.3  | 5851.0  | 5206.0  | 4278.3  | 5493.5  | 5558.7  | 11708.0 | 3891.8  |
| Yangtze        | 3598.1  | 4098.9  | 5297.3  | 5673.4  | 4601.3  | 4665.4  | 18168.0 | 8325.8  |
| Murray-Darling | 373.7   | 823.6   | 763.8   | 1471.0  | 1264.6  | 699.8   | 4060.3  | 364.8   |

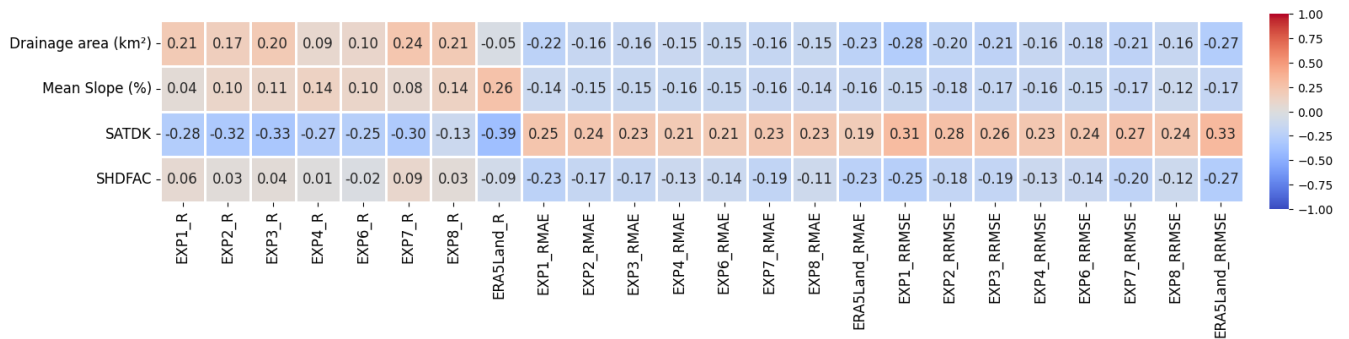

10

**Figure S1: Correlation Heatmap between Experiment Performances (R, RMAE, RRMSE) and Geophysical and Vegetative Properties (Drainage Area, Mean Slope, Saturated Soil Hydraulic Conductivity (SATDK), Vegetation Fraction (SHDFAC)).**

To evaluate the correlation between experiment performances and soil/vegetation types, we used saturated soil hydraulic conductivity (SATDK) and vegetation fraction (SHDFAC) as representative quantitative values. This allowed us to perform a meaningful correlation analysis, as soil type and vegetation are typically categorical and not directly correlatable.

Larger basins tend to have higher discharge magnitudes, which can naturally lead to larger MAE and RMSE values. To account for this inherent scaling issue and to provide a more normalized assessment of model performance, Relative Mean Absolute Error (RMAE) and Relative Root Mean Squared Error (RRMSE) were calculated. This normalization is achieved by dividing the MAE and RMSE values by the mean of the observed discharge values for each basin, allowing for a more equitable comparison of model performance across basins of varying scales.

The heatmap illustrates the generally weak correlations between geophysical and vegetative properties and the performance of different runoff experiments. The slightly moderate negative correlation with hydraulic conductivity (SATDK) suggests that in basins with high hydraulic conductivity soils, there is a challenge in capturing the hydrograph shape accurately. This is likely because high hydraulic conductivity increases subsurface runoff at the expense of surface runoff, and the CaMa-Flood routing model does not differentiate between these two types of runoff, affecting the timing and shape of the hydrograph and thus, negatively the R coefficient and positively the bias.

This also supports our previous discussion on CaMa-Flood limitations.
